# Supplementary material for: Differential Expression of Anti-Inflammatory RNA Binding Proteins in Lupus Nephritis
Source: MDPI journal article supplement (doi:10.3390/life12101474), 2022-09-23
Supplement: s1 [file s1]

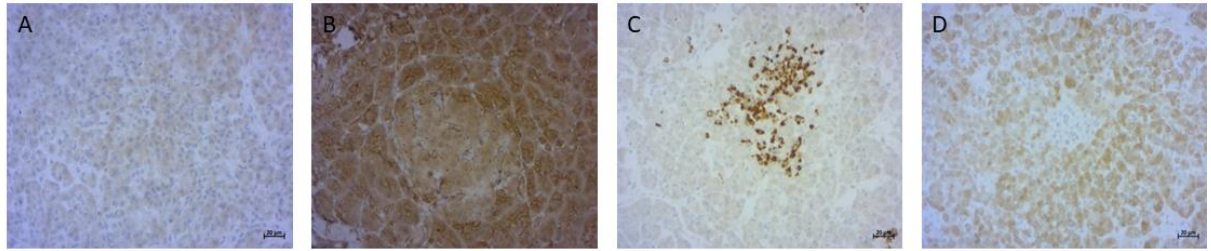

Figure S1. Labeling of islets of Langerhans in a section of the pancreas with anti-TTP (A), anti-Regnase-1 (B), anti-Roquin-1 (C), and anti-Roquin-2 (D) antibodies.

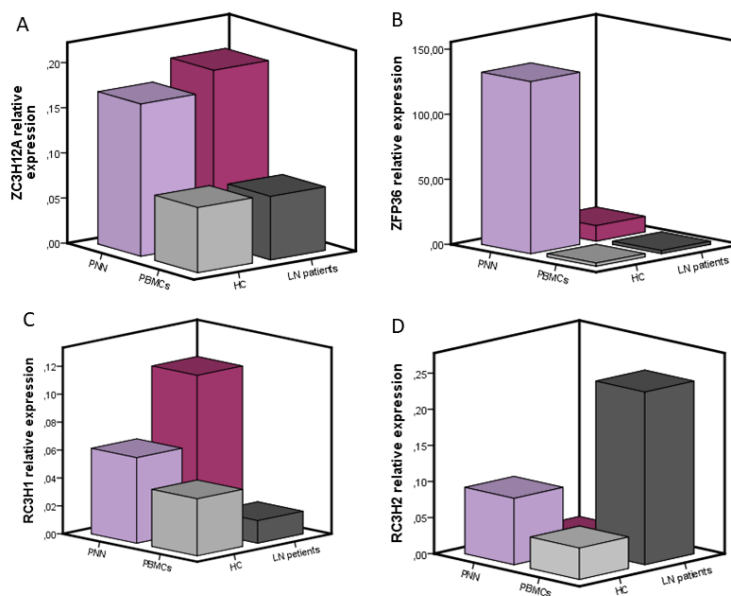

Figure S2. 3D box illustration of mRNA levels of anti-inflammatory RNA-binding proteins (RBPs) of (A) *ZC3H12A* (Regnase-1 gene), (B) *ZFP36* (TTP gene), (C) *RC3H1* (Roquin-1 gene), and (D) *RC3H2* (Roquin-2 gene), in different blood cells, between lupus nephritis (LN) patients (n=9) and healthy controls (HC) (n=9) after normalization with GAPDH mRNA level.

**Table S1:** Sequences of gene-specific primers used in quantitative real-time PCR analysis

| <i>Gene</i> (NCBI Reference Sequence)                                                                         | Gene-specific primers       | Product Length |
|---------------------------------------------------------------------------------------------------------------|-----------------------------|----------------|
| <i>GAPDH</i><br>(NM_001357943.2, NM_002046.7)                                                                 | F: GCTCTCTGCTCCTCCTGTTC     | 123 pb         |
|                                                                                                               | R: CGCCCAATACGACCAAATCC     |                |
| <i>ZC3H12A</i><br>(NM_001323551.2, NM_001323550.2, NM_025079.3)                                               | F: GCAGCGACCTGAGACCA        | 191 pb         |
|                                                                                                               | R: GTCTGTGATGGGCACGTC       |                |
| <i>ZFP36</i><br>(NM_003407.5)                                                                                 | F: GGAGTGTCTTCCGAGGTTCTT    | 241 pb         |
|                                                                                                               | R: GCTACTTGCTTTTGGAGGGTAAT  |                |
| <i>RC3H1</i><br>(NM_172071.4, NM_001300852.1, NM_001300851.1, NM_001300850.1)                                 | F: GGCAGCTCGATCTTTAGGTG     | 381 pb         |
|                                                                                                               | R: TGTTCTCGCCGCAGAGCTTCA    |                |
| <i>RC3H2</i><br>(NM_018835.5, NM_001354478.2, NM_001354482.2, NM_001354479.2, NM_001354486.2, NM_001100588.3) | F: GCGTTGAGGATTTGGCACTC     | 156 pb         |
|                                                                                                               | R: GCATGGCTCTTACACGACCT     |                |
| <i>TNF-<math>\alpha</math></i><br>(NM_000594.4)                                                               | F: CCAGGCAGTCAGATCATCTTCTC  | 150 pb         |
|                                                                                                               | R: AGCTGGTTATCTCTCAGCTCGAC  |                |
| <i>IL-6</i><br>(NM_001371096.1, NM_001318095.2, NM_000600.5)                                                  | F: CAATCTGGATTCAATGAGGAGAC  | 118 pb         |
|                                                                                                               | R: CTCTGGCTTGTTTCCTCACTACTC |                |
| <i>ICOS</i><br>(NM_012092.4)                                                                                  | F: TTTGAACACTGAACGCGAGG     | 119 pb         |
|                                                                                                               | R: CAGAACCATTGATTTCTCCTGTT  |                |

glyceraldehyde-3-phosphate dehydrogenase (GAPDH), zinc finger CCCH-type containing 12A (ZC3H12A), zinc finger protein 36 (ZFP36), ring finger and CCCH-type domains 1 (RC3H1), ring finger and CCCH-type domains 2 (RC3H2), tumor necrosis factor (TNF), interleukin 6 (IL-6), inducible T cell costimulator (ICOS). Forward (F), Reverse (R).
